# Supplementary material for: Transcription factor EB (TFEB) improves ventricular remodeling after myocardial infarction by inhibiting Wnt/β-catenin signaling pathway
Source: PeerJ journal article supplement (doi:10.7717/peerj.15841), 2023-08-18
Supplement: gel.zip [file gel.zip]

Figure3.

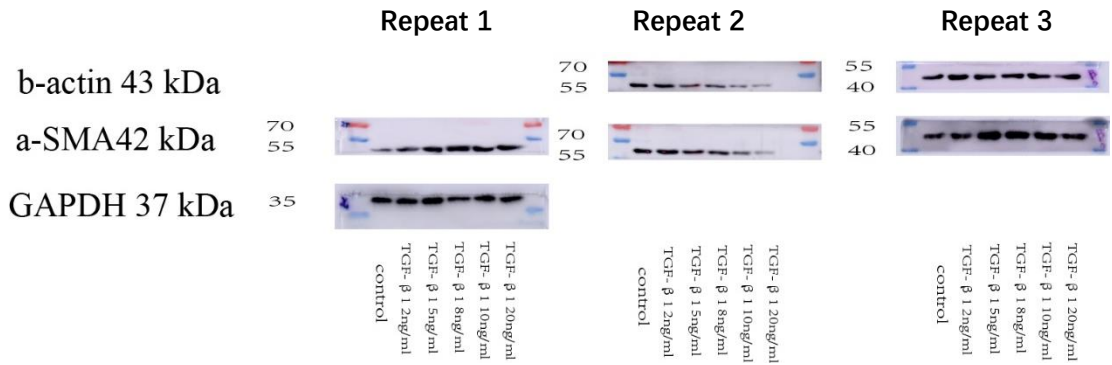

Effects of TGF-β1 of different concentrations and incubation time on the expression of α-SMA was detected using Western blotting.

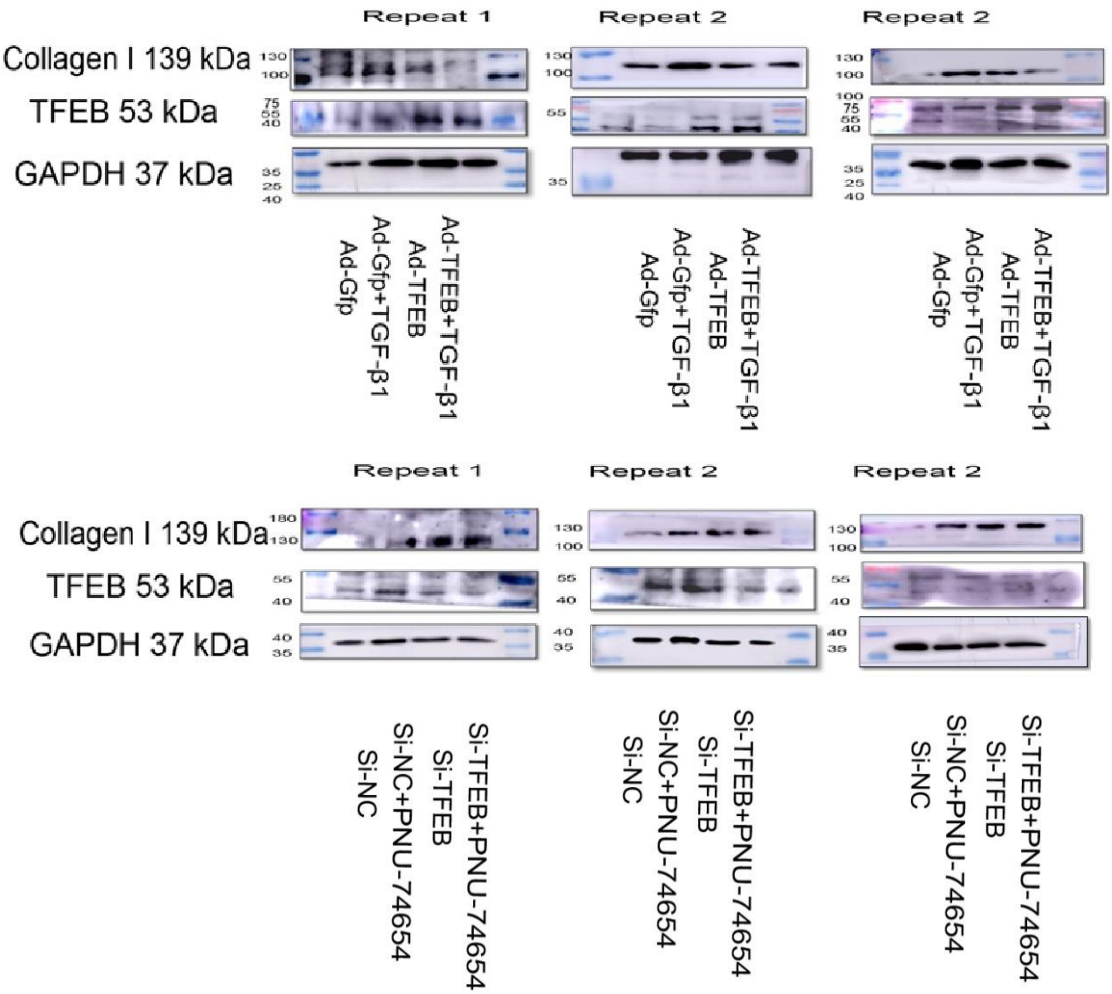

The expression difference of Collagen I of CFs co-incubated with TGF-β1 (5 ng/mL) for 24 hours was detected using Western blot.

Figure4.

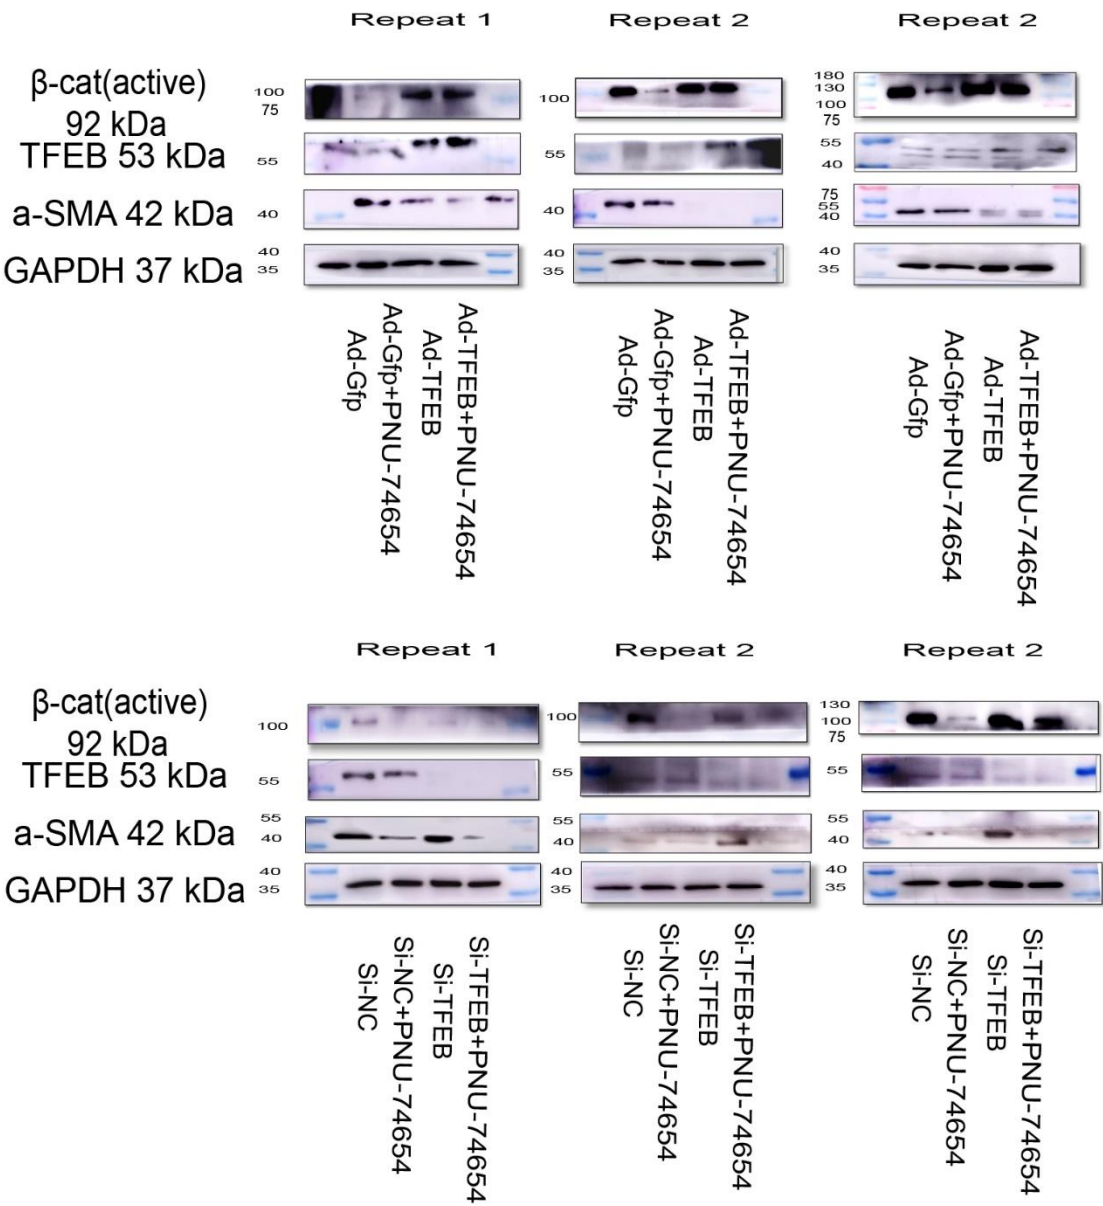

The expression of  $\alpha$ -SMA was detected using Western blotting. PNU-74654 (100 ng/mL) was used to for 12 hours to inhibit  $\beta$ -catenin-TCF/LEF1 complex.
