# Supplementary material for: Transcription factor EB (TFEB) improves ventricular remodeling after myocardial infarction by inhibiting Wnt/β-catenin signaling pathway
Source: PubMed Central journal article supplement (PMC10441526; doi:10.7717/peerj.15841), 2023-08-18

AAV9-NC

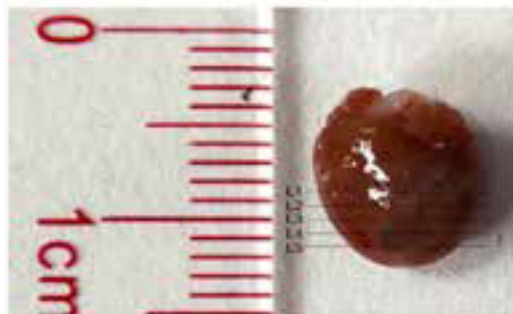

AAV9-TFEB

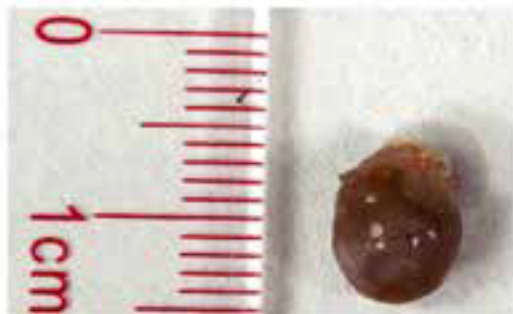

AAV9-shNC

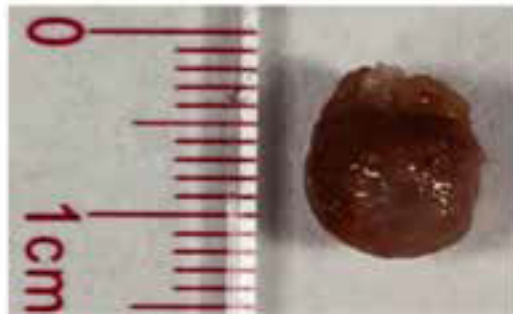

AAV9-shTFEB

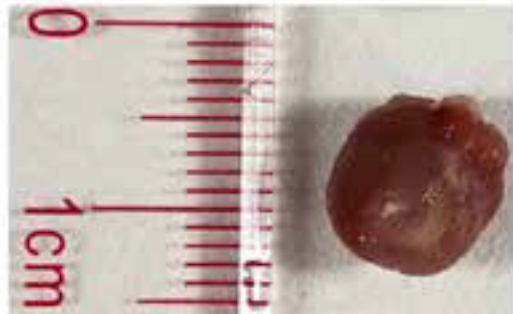

Supplement: peerj-11-15841-s002.pdf [file peerj-11-15841-s002.pdf]
