# Supplementary material for: Transcription factor EB (TFEB) improves ventricular remodeling after myocardial infarction by inhibiting Wnt/β-catenin signaling pathway
Source: PeerJ journal article supplement (doi:10.7717/peerj.15841), 2023-08-18

3W

4W

AAV9-NC

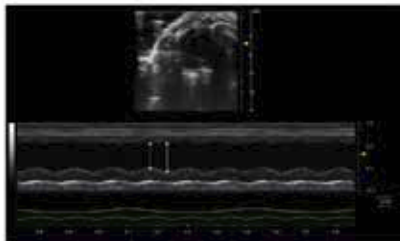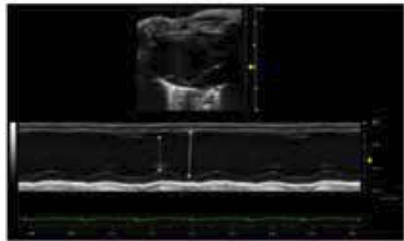

AAV9-TFEB

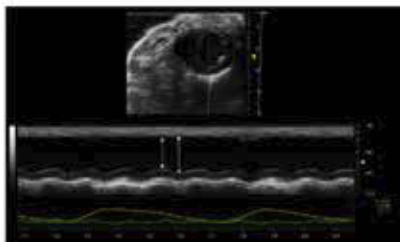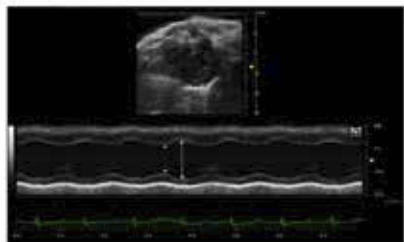

AAV9-shNC

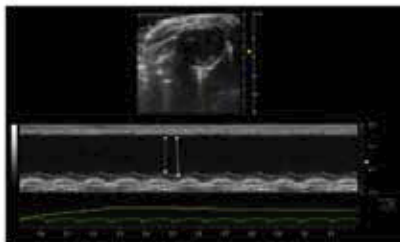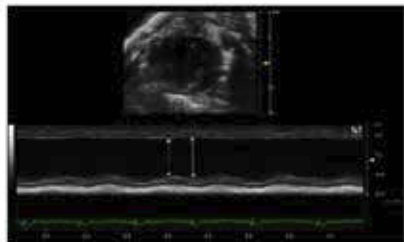

AAV9-shTFEB

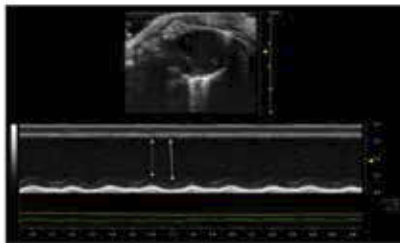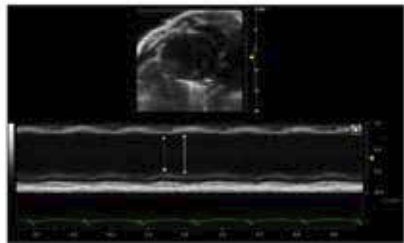

Supplement: Supplementary_FIGURE_3.pdf [file Supplementary_FIGURE_3.pdf]
