# Supplementary material for: Transcription factor EB (TFEB) improves ventricular remodeling after myocardial infarction by inhibiting Wnt/β-catenin signaling pathway
Source: PeerJ journal article supplement (doi:10.7717/peerj.15841), 2023-08-18

**A**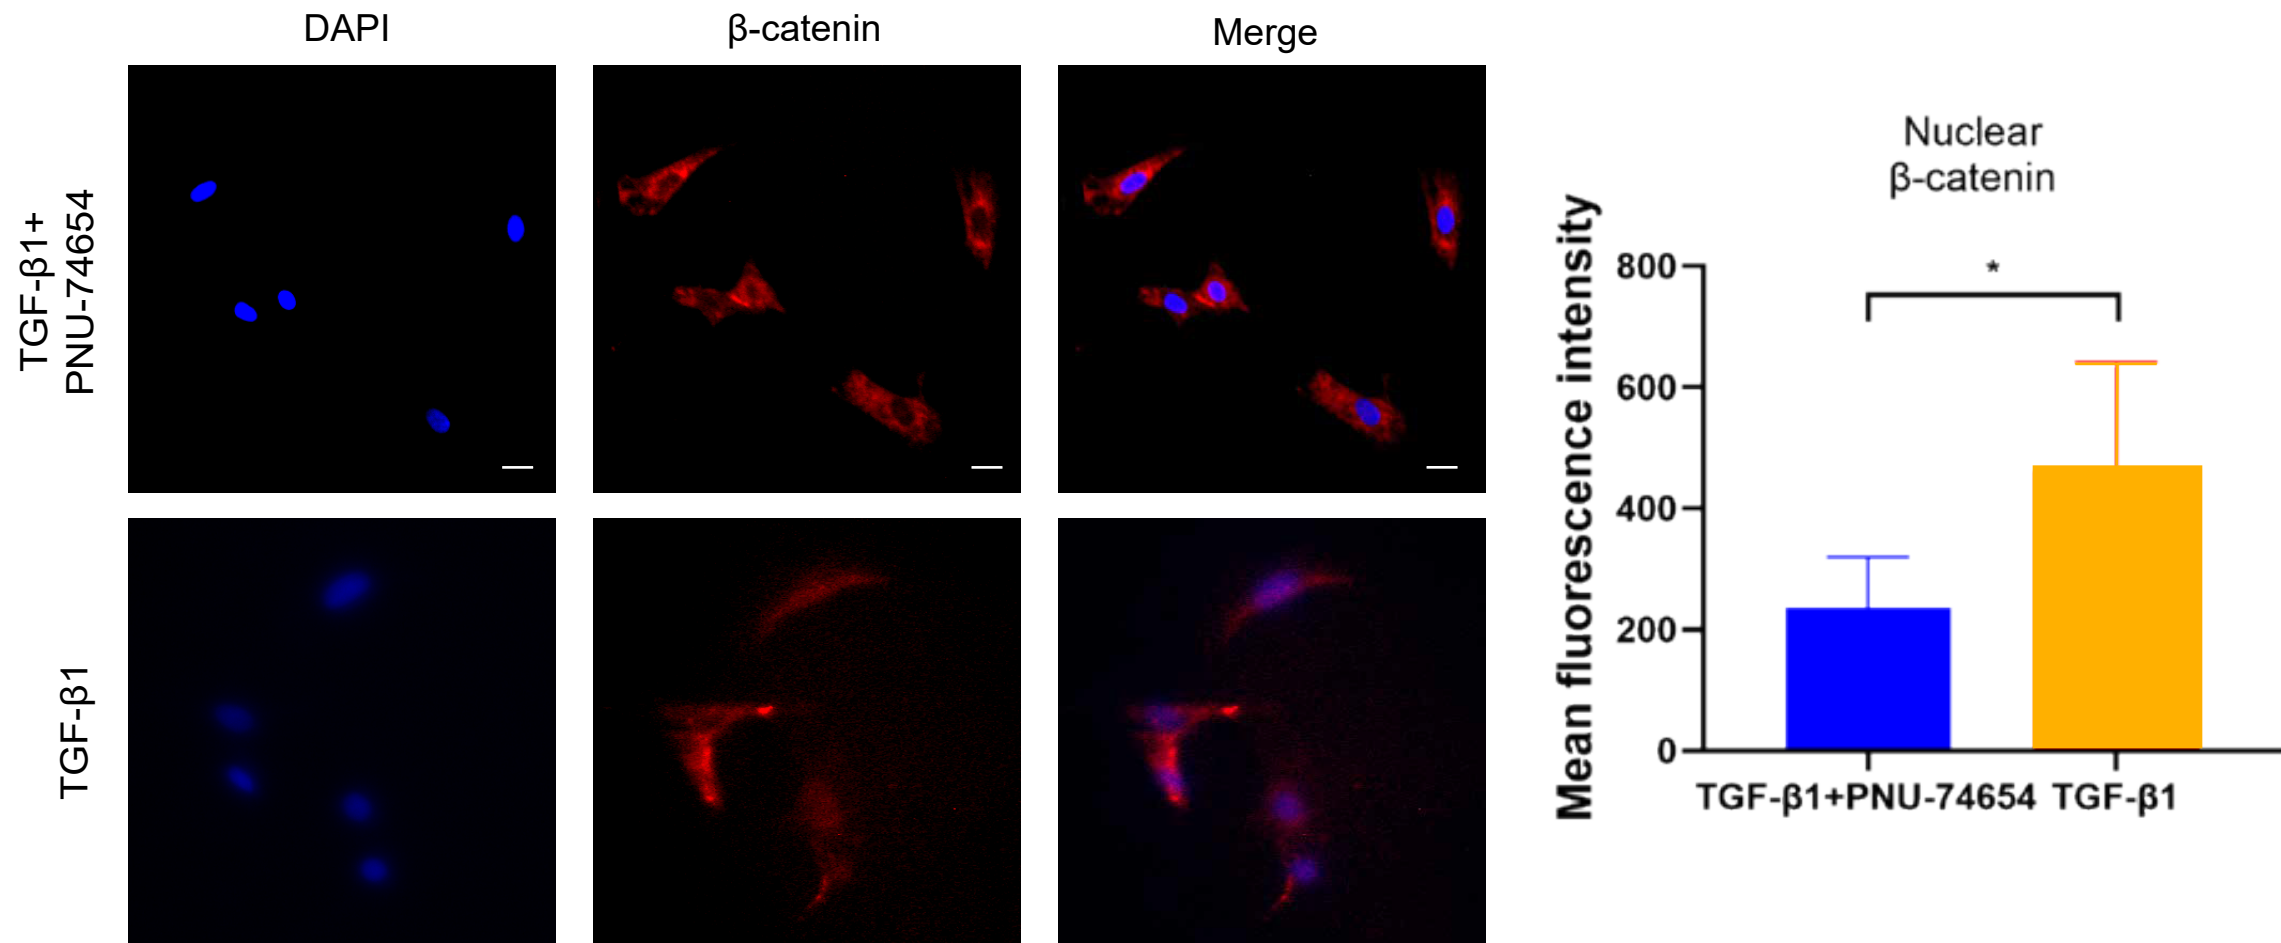**B**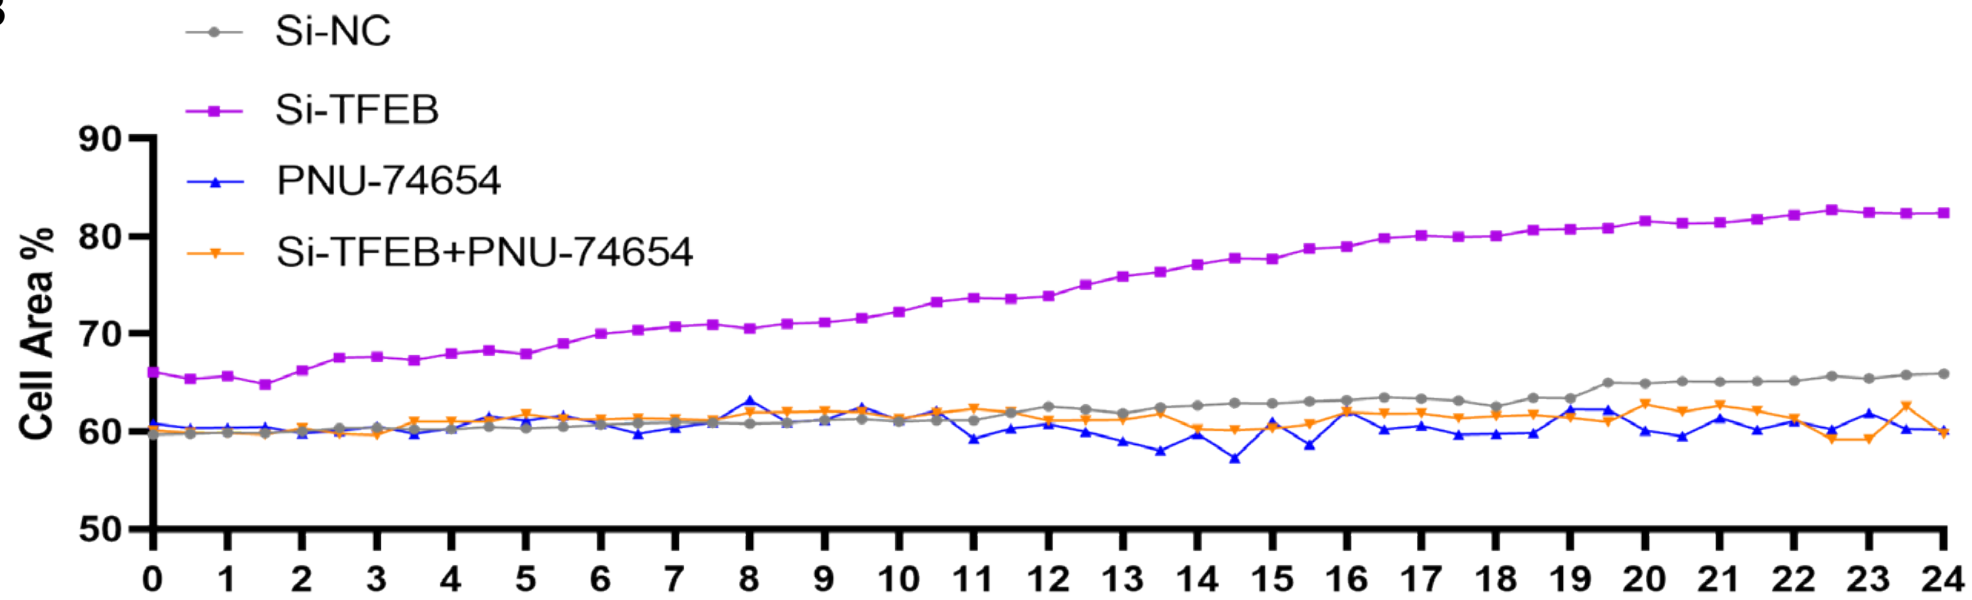

Supplement: Supplementary_FIGURE_7.pdf [file Supplementary_FIGURE_7.pdf]
